# Supplementary material
Source: PubMed Central journal article supplement (PMC10163308)
Supplement: BLOOD_BLD-2022-017863-mmc1.pdf [file BLOOD_BLD-2022-017863-mmc1.pdf]

Supplemental figure S1. Flowchart.

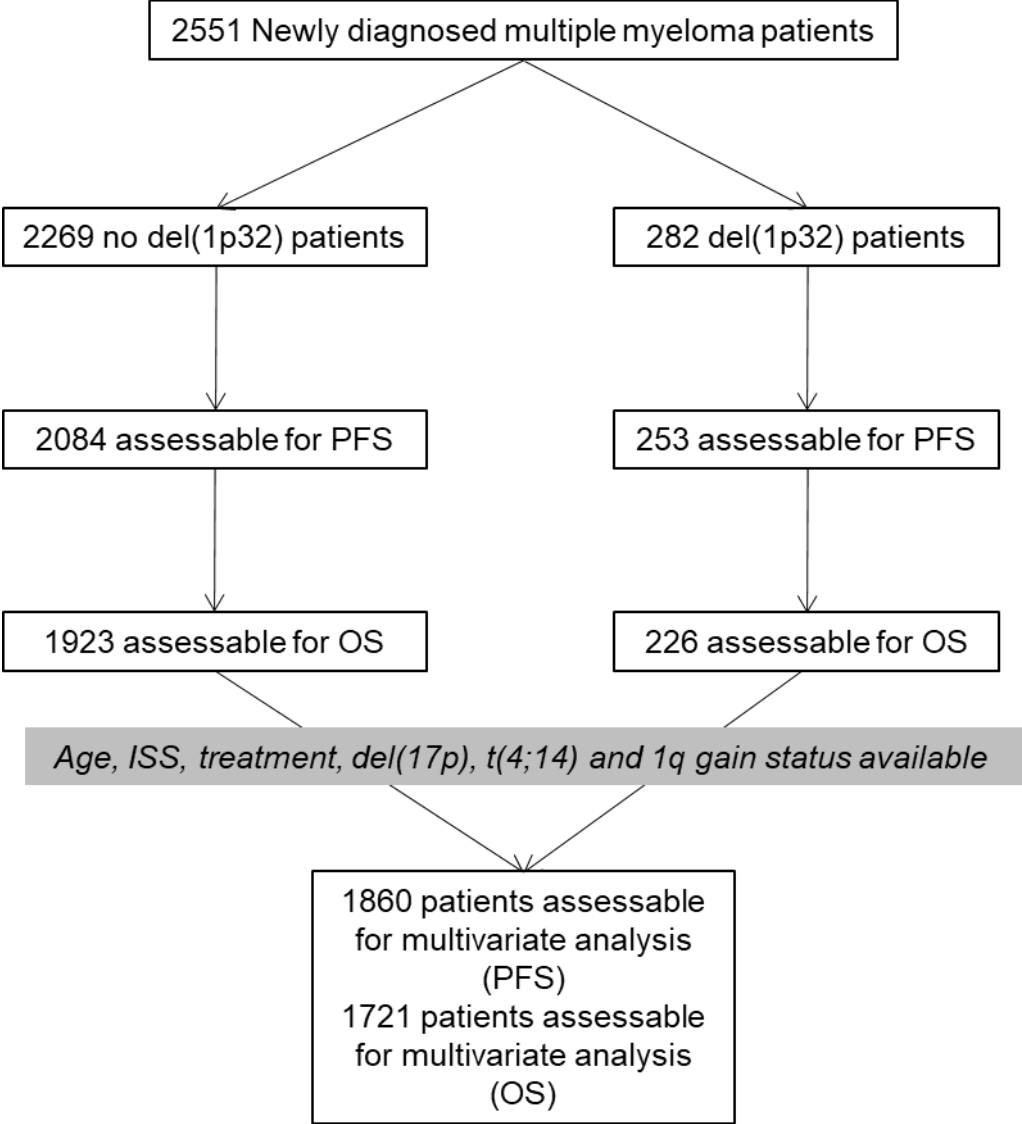

**Supplemental figure S2. Kaplan-Meier overall survival of NDMM patients according to del(1p32) (negative, biallelic or monoallelic deletion) and other cytogenetics abnormalities. P-values are determined by the log-rank test comparison. A. Overall survival according to del(1p32) and del(17p) status. B. Overall survival according to del(1p32) and gain(1q) status.**

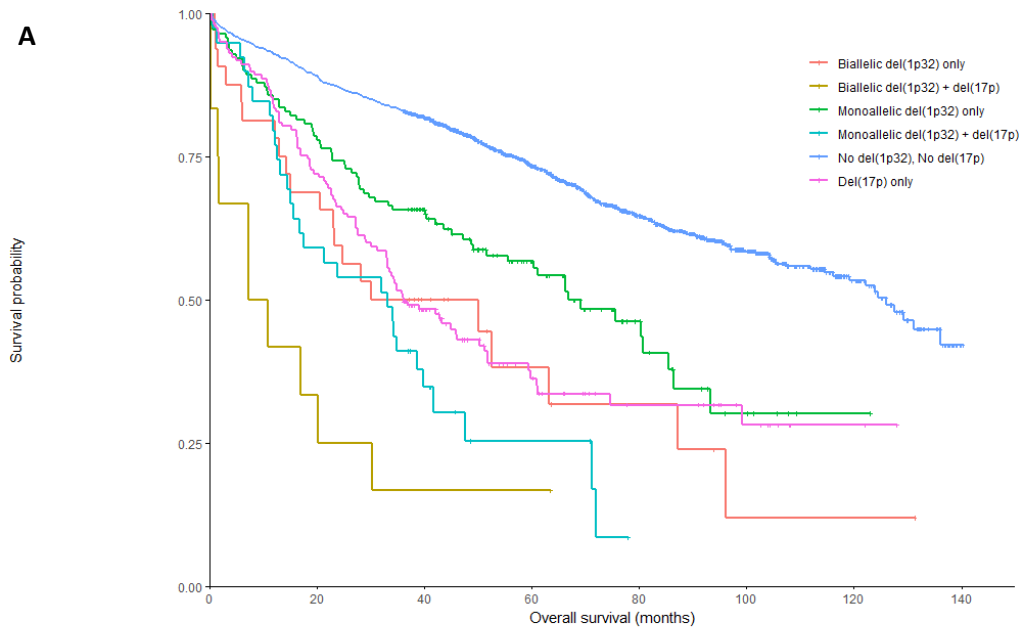

|                                | 0    | 20   | 40   | 60  | 80  | 100 | 120 | 140 |
|--------------------------------|------|------|------|-----|-----|-----|-----|-----|
| Biallelicdel(1p32) only        | 32   | 22   | 12   | 6   | 4   | 1   | 1   | 0   |
| Biallelicdel(1p32)+ del(17p)   | 12   | 4    | 2    | 2   | 0   | 0   | 0   | 0   |
| Monoallelicdel(1p32) only      | 140  | 109  | 82   | 45  | 18  | 6   | 1   | 0   |
| Monoallelicdel(1p32)+ del(17p) | 39   | 23   | 11   | 4   | 0   | 0   | 0   | 0   |
| No del(1p32), No del(17p)      | 1761 | 1567 | 1310 | 768 | 429 | 206 | 68  | 1   |
| Del(17p) only                  | 157  | 113  | 64   | 28  | 15  | 8   | 2   | 0   |

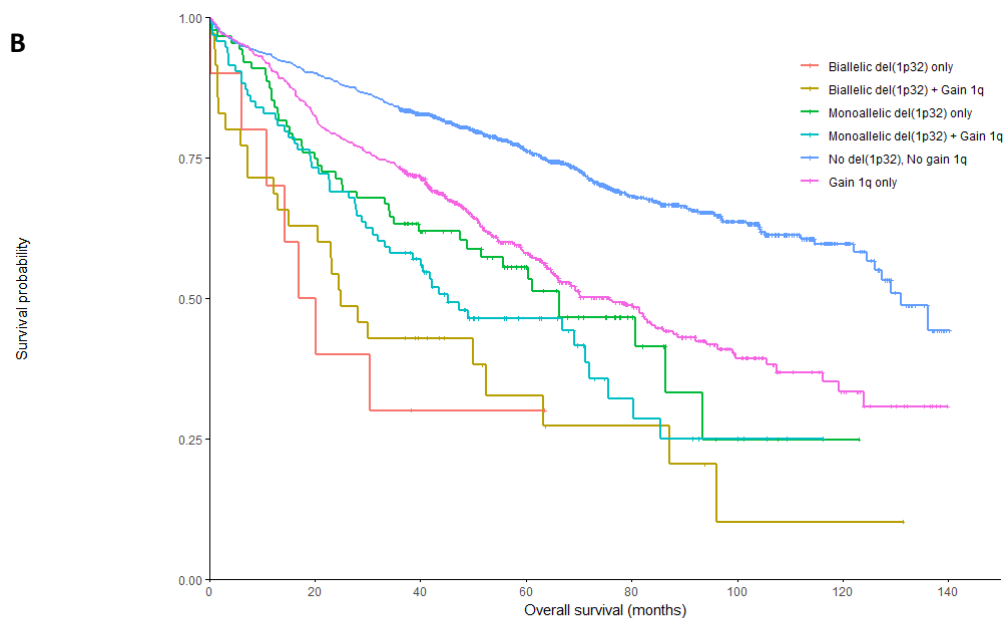

|                               | 0    | 20   | 40  | 60  | 80  | 100 | 120 | 140 |
|-------------------------------|------|------|-----|-----|-----|-----|-----|-----|
| Biallelicdel(1p32) only       | 10   | 5    | 2   | 2   | 0   | 0   | 0   | 0   |
| Biallelicdel(1p32)+ Gain 1q   | 35   | 22   | 12  | 6   | 4   | 1   | 1   | 0   |
| Monoallelicdel(1p32) only     | 87   | 65   | 45  | 26  | 10  | 2   | 1   | 0   |
| Monoallelicdel(1p32)+ Gain 1q | 93   | 68   | 49  | 24  | 9   | 5   | 0   | 0   |
| No del(1p32), No gain 1q      | 1299 | 1169 | 974 | 594 | 343 | 167 | 52  | 1   |
| Gain 1q only                  | 624  | 515  | 403 | 203 | 101 | 47  | 18  | 0   |

**Supplemental figure S3. Kaplan-Meier survival of NDMM patients without HR CA.** HR CA are defined by the presence of del(17p), t(4;14), and/or gain(1q). P-values are determined by the log-rank test comparison. A. Overall survival according to del(1p32). B. Progression-free survival according to del(1p32).

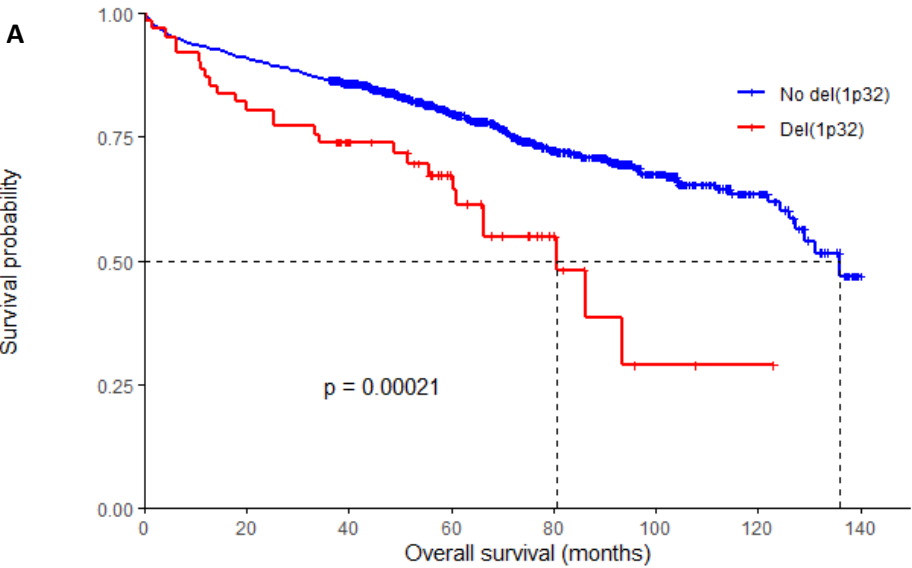

**Number at risk**

|              |      |      |     |     |     |     |    |   |
|--------------|------|------|-----|-----|-----|-----|----|---|
| No del(1p32) | 1122 | 1019 | 871 | 534 | 315 | 151 | 48 | 1 |
| Del(1p32)    | 61   | 49   | 38  | 23  | 9   | 2   | 1  | 0 |

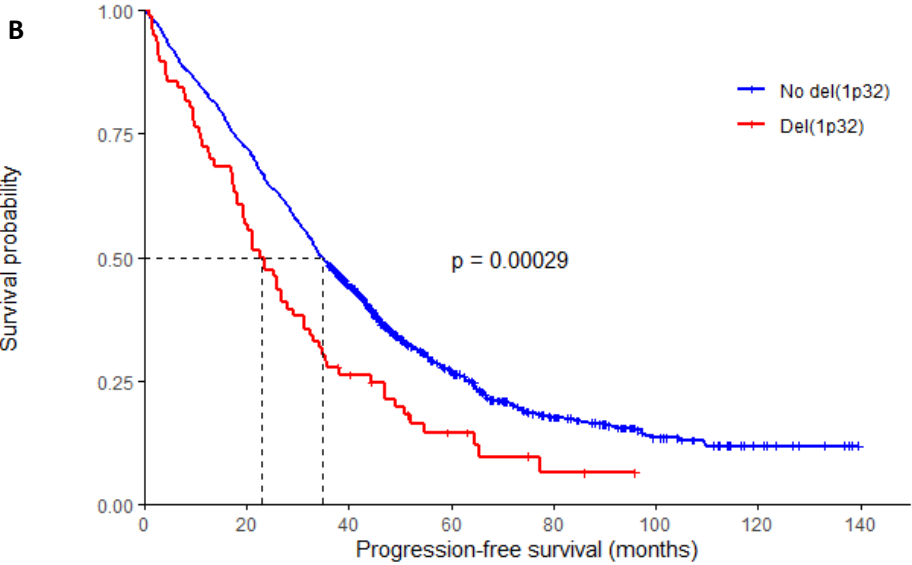

**Number at risk**

|              |      |     |     |     |    |    |    |   |
|--------------|------|-----|-----|-----|----|----|----|---|
| No del(1p32) | 1199 | 863 | 478 | 193 | 84 | 34 | 11 | 0 |
| Del(1p32)    | 76   | 43  | 19  | 7   | 2  | 0  | 0  | 0 |
